# Supplementary material for: A Novel Splice-Site Mutation in MSH2 Is Associated With the Development of Lynch Syndrome
Source: PubMed Central journal article supplement (PMC7318799; doi:10.3389/fonc.2020.00983), 2020-06-19
Supplement: Table_1.pdf [file Table_1.pdf]

Supplementary Table 1. Proband's whole-exome sequencing in detail

| <b>Exome Capture Statistics</b>                 | <b>Proband</b> |
|-------------------------------------------------|----------------|
| Raw reads (bp)                                  | 229789072      |
| Clean reads (bp)                                | 229158346      |
| GC (%)                                          | 52.09          |
| Initial bases on target (bp)                    | 60456963       |
| Total effective reads (bp)                      | 201325227      |
| Total effective bases (Mb)                      | 19884.90       |
| Effective sequences on target (Mb)              | 14486.50       |
| Capture specificity (%)                         | 72.85          |
| Mapping rate on genome (%)                      | 99.91          |
| Duplicate rate on genome (%)                    | 12.16          |
| Mismatch rate in target region (%)              | 0.42           |
| Average sequence depth on target (X)            | 239.62         |
| Fraction of target region covered $\geq 1X$ (%) | 99.71          |
| Fraction of target region covered $\geq 4X$ (%) | 99.66          |
| Gender                                          | Female         |
